# Supplementary material for: Microbiome in the hair follicle of androgenetic alopecia patients
Source: PLOS journal article supplement (doi:10.1371/journal.pone.0216330), 2019-05-03
Supplement: S1 (10.1371/journal.pone.0216330.s001) [file journal.pone.0216330.s001]

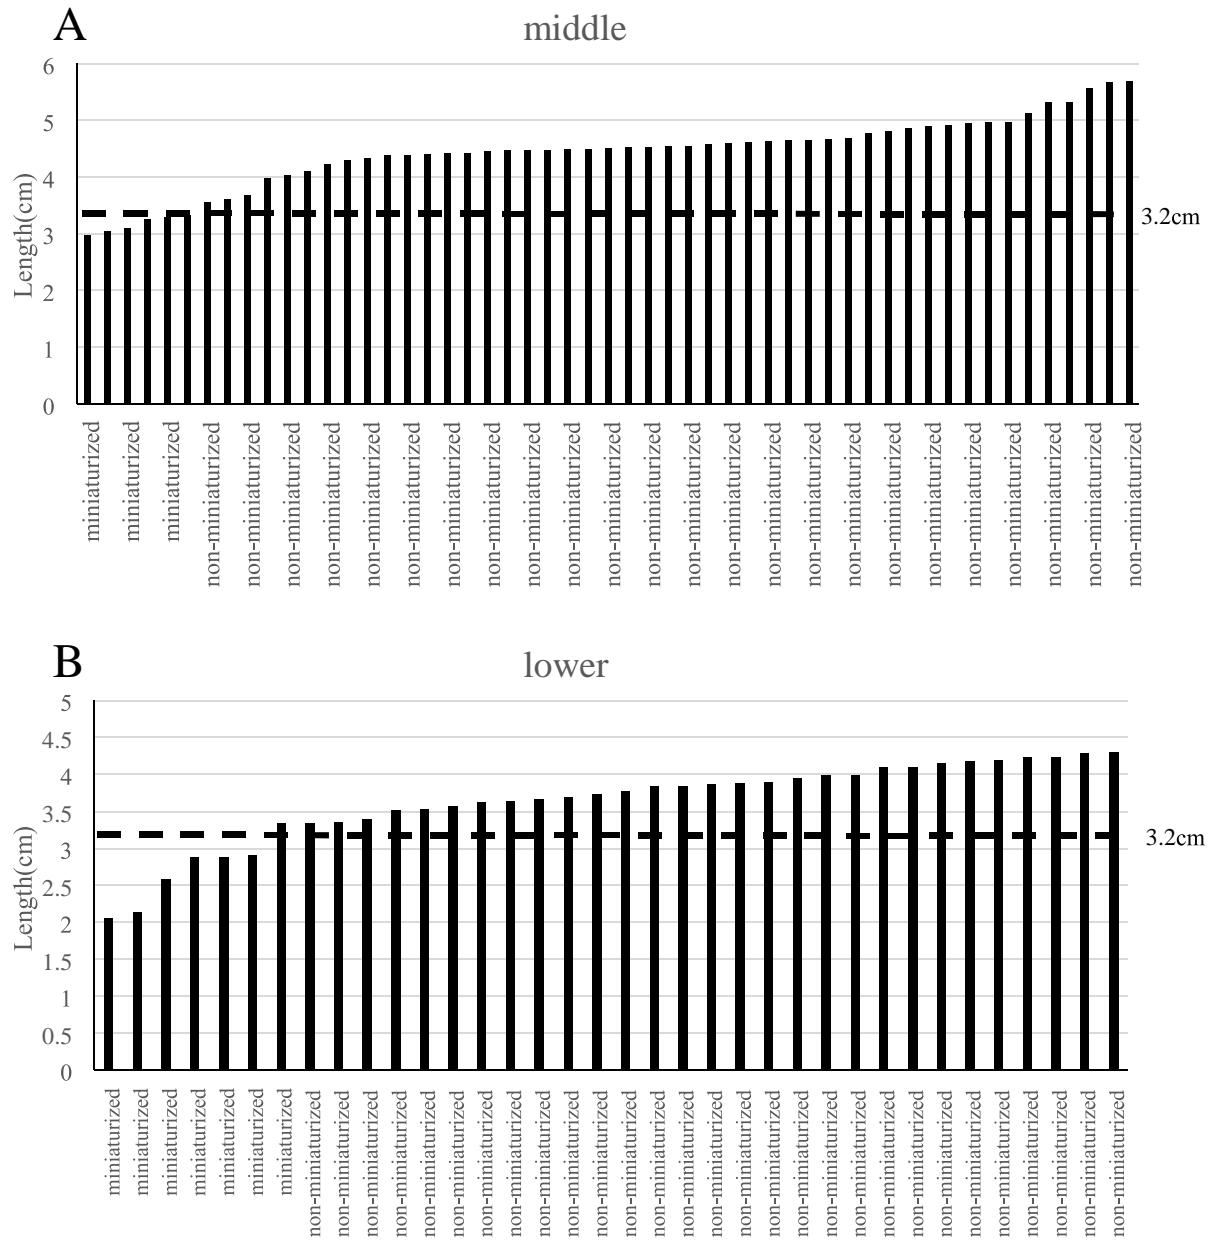

**S1 Fig. Length of hair samples.** Length of hair follicle samples for A. middle piece and B. lower piece used in the analysis. Miniaturized hair lower than 3.2cm are classified miniaturized in this study.
